# Supplementary material for: Panoramic insights into semi-artificial photosynthesis: origin, development, and future perspective
Source: Royal Society of Chemistry journal article supplement (doi:10.1039/d1ee03094a), 2021-12-17
Supplement: d1ee03094a1.pdf [file d1ee03094a1.pdf]

## Supplementary Information

### **Panoramic insights into semi-artificial photosynthesis: origin, development, and future perspective**

Kemeng Xiao<sup>a,c,e,#</sup>, Jun Liang<sup>a,#</sup>, Xinyu Wang<sup>a,#</sup>, Tianfeng Hou<sup>a</sup>, Xiaoning Ren<sup>a</sup>, Panqing Yin<sup>a</sup>,  
Zhiping Ma<sup>a</sup>, Cuiping Zeng<sup>a</sup>, Xiang Gao<sup>a</sup>, Tao Yu<sup>a</sup>, Tong Si<sup>a</sup>, Bo Wang<sup>a,\*</sup>, Chao Zhong<sup>a,\*</sup>, Zhifeng  
Jiang<sup>b,\*</sup>, Chun-Sing Lee<sup>c</sup>, Jimmy Chai-mei Yu<sup>d</sup>, Po Keung Wong<sup>e,f</sup>

<sup>a</sup> CAS Key Laboratory of Quantitative Engineering Biology, Shenzhen Institute of Synthetic  
Biology, Shenzhen Institute of Advanced Technology, Chinese Academy of Sciences, Shenzhen  
518055, China

<sup>b</sup> Institute for Energy Research, School of Chemistry and Chemical Engineering, Jiangsu University,  
Zhenjiang 212013, China

<sup>c</sup> Center of Super-Diamond and Advanced Films (COSDAF) & Department of Chemistry, City  
University of Hong Kong, 83 Tat Chee Avenue, Kowloon, Hong Kong

<sup>d</sup> Department of Chemistry, The Chinese University of Hong Kong, Shatin, New Territories, Hong  
Kong SAR, China

<sup>e</sup> School of Life Sciences, The Chinese University of Hong Kong, Shatin, New Territories, Hong  
Kong SAR, China

<sup>f</sup> Institute of Environmental Health and Pollution Control, School of Environmental Science &  
Engineering, Guangdong University of Technology, Guangzhou 510006, China.

# Equal contribution

\* Corresponding authors

E-mail addresses:

bo.wang@siat.ac.cn (Bo Wang)

chao.zhong@siat.ac.cn (Chao Zhong)

ntjiangzf@sina.com (Zhifeng Jiang)

**Table S1** Summarization of previously reported reviews or prospects about SAPSs

| Year | Authors                                                               | Focus                                                                                                   | Journal                                     | References |
|------|-----------------------------------------------------------------------|---------------------------------------------------------------------------------------------------------|---------------------------------------------|------------|
| 2013 | Fuyu Wen and<br>Can Li                                                | Semiconductors as light harvesters and biomimetic complexes as molecular cocatalysts for photosynthesis | Acc. Chem. Res.                             | 1          |
| 2015 | Sai Kishore Ravi and Swee Ching Tan                                   | Immobilizing the photosynthetic biomolecules in photovoltaic devices for photocurrent generation        | Energy Environ. Sci.                        | 2          |
| 2018 | Sahng Ha Lee, Da Som Choi, Su Keun Kuk, and Chan Beum Park            | Photoinduced electrons transfer on the interface of nanomaterials and redox enzymes                     | Angew. Chem. Int. Ed.                       | 3          |
| 2018 | Elshan Musazade, Roman Voloshin, and Suleyman I. Allakhverdiev, etc.  | Light-to-current conversion by biohybrid solar cells                                                    | J. Photochem. Photobiol. C: Photochem. Rev. | 4          |
| 2018 | Nikolay Kornienko, Kelsey K. Sakimoto, Peidong Yang and Erwin Reisner | Summarizing different semi-artificial photosynthetic systems for S2C                                    | Nat. Nanotechnol.                           | 5          |
| 2018 | Kelsey K. Sakimoto, Nikolay Kornienko and Peidong Yang                | Physical biology of the materials–microorganism interface                                               | J. Am. Chem. Soc.                           | 6          |
| 2020 | Dandan Zheng, Ying Zhang, Xiaohong Liu, Jiangyun Wang                 | Combination of photosensitizer and enzymes for S2C.                                                     | Photosynth. Res.                            | 7          |
| 2020 | Xiaoqiang Huang,                                                      | Merging biocatalysis with chemocatalysis for photo-                                                     | Curr Opin Chem Biol                         | 8          |

---

|      |                                                                                                                  |                                                                                                                                                           |                            |    |
|------|------------------------------------------------------------------------------------------------------------------|-----------------------------------------------------------------------------------------------------------------------------------------------------------|----------------------------|----|
|      | Mingfeng Cao<br>and Huimin<br>Zhao                                                                               | /electricity-driven<br>biotransformations                                                                                                                 |                            |    |
| 2020 | Xin Fang,<br>Shafer Kalathil<br>and Erwin<br>Reisner                                                             | semi-artificial photosynthesis of<br>enzyme-material and cell-<br>material for S2C                                                                        | Chem. Soc. Rev.            | 9  |
| 2020 | Prakash C.<br>Sahoo, Deepak<br>Pant Manoj and<br>S.S.V.<br>Ramakumar                                             | Material-microbe biohybrid for<br>solar-driven CO2 bio-<br>electrosynthesis                                                                               | Trends Biotechnol.         | 10 |
| 2020 | Stefano<br>Cestellos-<br>Blanco, Hao<br>Zhang, Ji Min<br>Kim, Yue-xiao<br>Shen and<br>Peidong Yang               | Material-microbe biohybrid for<br>solar-driven chemical conversion                                                                                        | <b>Nat. Catal.</b>         | 11 |
| 2020 | Zhu Chen <sup>1</sup> ,<br>Junping Zhou <sup>1</sup> ,<br>Yifen Wang <sup>1,2</sup><br>and Yi Wang <sup>1</sup>  | Tuning microbial metabolisms<br>by nano-based artificial<br>mediators to enhance production<br>of biochemicals instead of<br>synthetic biological method. | Curr. Opin.<br>Biotechnol. | 12 |
| 2021 | Peidong Yang                                                                                                     | Introduction evolution of<br>photosynthetic materials                                                                                                     | Nano Lett.                 | 13 |
| 2021 | Bin Xu, Zhe Li,<br>Yujia Jiang,<br>Minjiao Chen,<br>Boryann Chen,<br>Fengxue Xin,<br>Weiliang Dong,<br>Min Jiang | Bi-directional electron<br>transfer between abiotic/biotic<br>interfaces in electron-assisted<br>biosynthesis system                                      | Biotechnol. Adv.           | 14 |
| 2021 | Kiran<br>Kuruvinishetti,<br>Nikolay<br>Kornienko                                                                 | Summarized the techniques for<br>detecting photo/electro-synthetic<br>materials-microorganism<br>interface                                                | iScience                   | 15 |

---

## References

1. F. Wen and C. Li, *Accounts of chemical research*, 2013, **46**, 2355-2364.
2. S. K. Ravi and S. C. Tan, *Energy & Environmental Science*, 2015, **8**, 2551-2573.
3. S. H. Lee, D. S. Choi, S. K. Kuk and C. B. Park, *Angewandte Chemie International Edition*, 2018, **57**, 7958-7985.
4. E. Musazade, R. Voloshin, N. Brady, J. Mondal, S. Atashova, S. K. Zharmukhamedov, I. Huseynova, S. Ramakrishna, M. M. Najafpour and J.-R. Shen, *Journal of Photochemistry and Photobiology C: Photochemistry Reviews*, 2018, **35**, 134-156.
5. N. Kornienko, J. Z. Zhang, K. K. Sakimoto, P. Yang and E. Reisner, *Nature nanotechnology*, 2018, **13**, 890-899.
6. K. K. Sakimoto, N. Kornienko, S. Cestellos-Blanco, J. Lim, C. Liu and P. Yang, *Journal of the American Chemical Society*, 2018, **140**, 1978-1985.
7. D. Zheng, Y. Zhang, X. Liu and J. Wang, *Photosynthesis research*, 2020, **143**, 221-231.
8. X. Huang, M. Cao and H. Zhao, *Current opinion in chemical biology*, 2020, **55**, 161-170.
9. X. Fang, S. Kalathil and E. Reisner, *Chemical Society Reviews*, 2020, **49**, 4926-4952.
10. P. C. Sahoo, D. Pant, M. Kumar, S. Puri and S. Ramakumar, *Trends in biotechnology*, 2020, **38**, 1245-1261.
11. S. Cestellos-Blanco, H. Zhang, J. M. Kim, Y.-x. Shen and P. Yang, *Nature Catalysis*, 2020, **3**, 245-255.
12. Z. Chen, J. Zhou, Y. Wang and Y. Wang, *Current opinion in biotechnology*, 2020, **64**, 161-168.
13. P. Yang, *Journal*, 2021.
14. B. Xu, Z. Li, Y. Jiang, M. Chen, B. Chen, F. Xin, W. Dong and M. Jiang, *Biotechnology Advances*, 2021, 107810.
15. K. Kuruvinashetti and N. Kornienko, *iScience*, 2021, 103049.
